# Supplementary material for: Au-deposited porous single-crystalline ZnO nanoplates for gas sensing detection of total volatile organic compounds
Source: Royal Society of Chemistry journal article supplement (doi:10.1039/c6ra05941d), 2016-01-01
Supplement: c6ra05941d1.pdf [file c6ra05941d1.pdf]

SUPPLEMENTARY DATA

(13 pages)

**Au-deposited porous single-crystalline ZnO nanoplates for gas sensing  
detection of total volatile organic compounds**

Xue Han, Yu Sun, Zhenyu Feng, Guochen Zhang, Zichun Chen, and Jinhua Zhan\*

*National Engineering Research Center for Colloidal Materials*

*and Key Laboratory for Colloid & Interface Chemistry of Education Ministry,*

*Department of Chemistry, Shandong University, Jinan Shandong, 250100, P. R. China.*

Table of contents

1. **Figure S1. Mapping images of (a) 1% Au@ZnO, (b) 3% Au@ZnO and (c) 5% Au@ZnO.**
2. **Table S1 Elemental analysis of 1% Au@ZnO, 3% Au@ZnO and 5% Au@ZnO.**
3. **Calculation of the average size of Au nanoparticles obtained from XRD pattern.**
4. **Table S2 Optimum temperature of each sensor for target gases of VOCs.**
5. **Figure S2. The relation between the sensor sensitivity and VOCs concentration measured at 360 °C for 5% Au@ZnO sensor.**
6. **Figure S3. Response curves of 5% Au@ZnO sensor towards methanol, diethyl ether, acetone, chlorobenzene, trichloro ethylene, methylbenzene, o-xylene and ethyl acetate with increasing concentration at 360 °C.**
7. **Figure S4. Typical nitrogen adsorption-desorption isotherm and BJH pore size distribution plots (inset) of (a) porous ZnO nanoplates and (b) 5% Au@ZnO.**
8. **Figure S5. SEM images of (a) (c) porous ZnO nanoplates and (b) (d) 5% Au@ZnO.**
9. **Table S3. The response time and recovery time of 5% Au@ZnO sensor at 100ppm.**
10. **Table S4. The response/recovery characteristics of other sensors based on metal oxide nanostructures.**
11. **Table S5. Previous reported about sensing performance of Au on ZnO nanoplates.**
12. **Table S6. Response of representative gases of each group.**

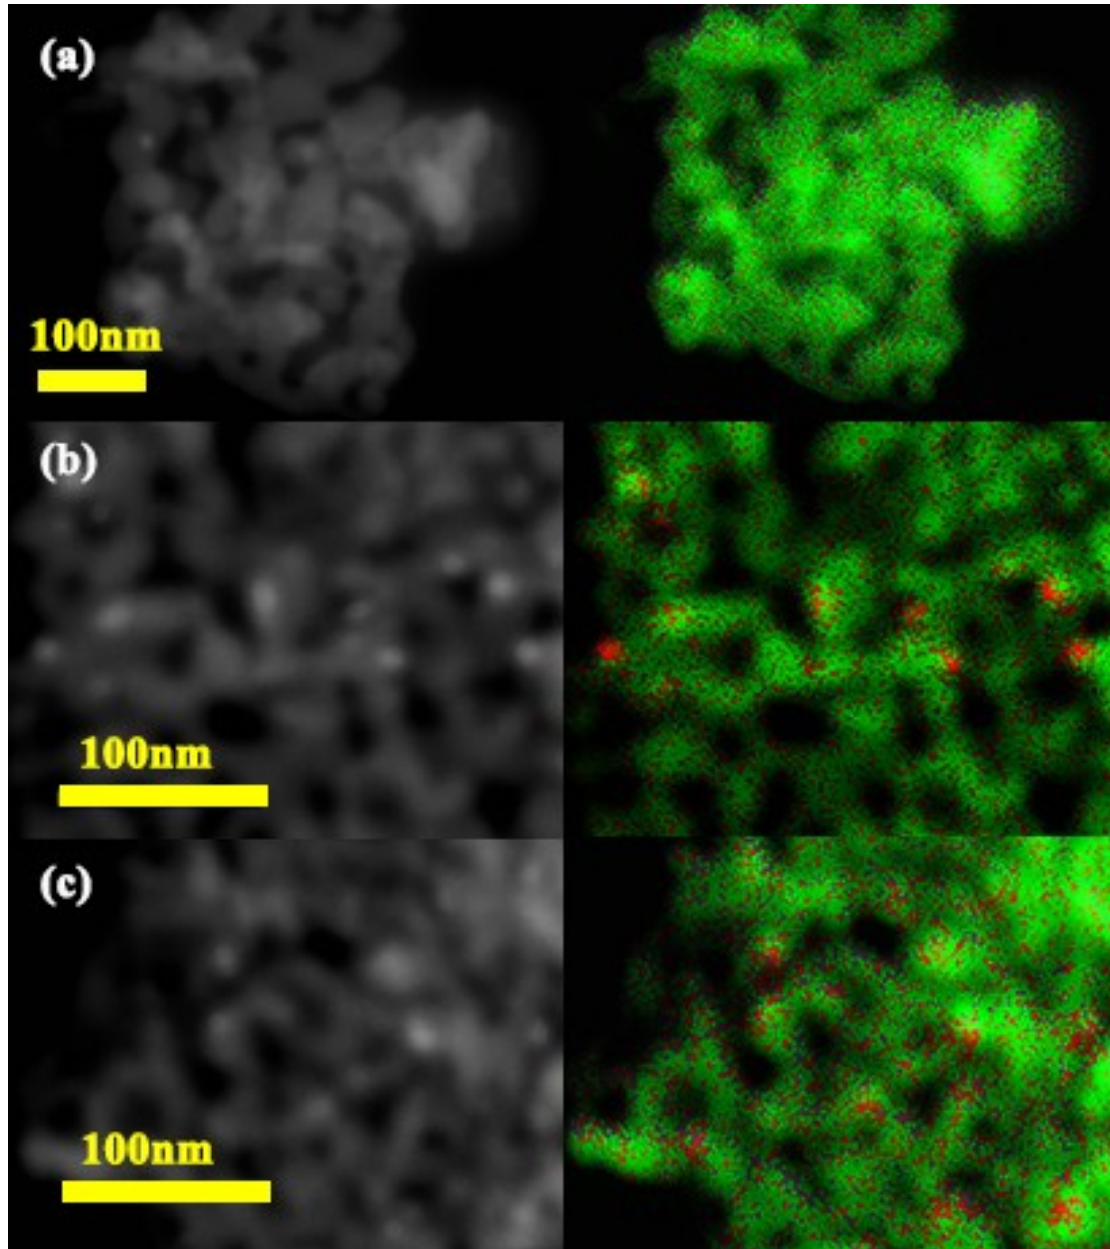

Figure S1. Mapping images of (a) 1% Au@ZnO, (b) 3% Au@ZnO and (c) 5% Au@ZnO.

**Table S1 Elemental analysis of 1% Au@ZnO, 3% Au@ZnO and 5% Au@ZnO**

| Element | 1% Au@ZnO | 3% Au@ZnO | 5% Au@ZnO |
|---------|-----------|-----------|-----------|
| O       | 55.39     | 57.09     | 52.55     |
| Zn      | 43.95     | 41.78     | 44.78     |
| Au      | 0.65      | 1.14      | 2.67      |

### Calculation of the average size of Au nanoparticles obtained from XRD pattern.

According to the XRD patterns, the average size also can be calculated by the full width at half maximum (FWHM), using the Scherrer equation:

$$D = K\lambda / B_{1/2} \cos \theta$$

where D represents the average size of the nanocrystalline,  $\lambda$  is the wavelength of incident X-rays radiation (0.15406 nm for Cu K $\alpha$ ),  $B_{1/2}$  represents the FWHM of the diffraction peak at  $2\theta$ ,  $\theta$  is the diffraction angle, and K is the Scherrer constant. The value for the coefficient "K", which is closed to 0.89, depends on the geometry of the crystallites [1, 2]. Take (111) peak of Au as examples, the average Au nanoparticles sizes of 1% Au@ZnO, 3% Au@ZnO and 5 % Au@ZnO were 12.80nm, 16.93nm and 14.29nm, respectively, which is closed to the results obtained according to TEM images.

[1]. H. P. Klug and L. E. Alexander, *X-ray diffraction procedures*, Wiley New York, 1954.

[2]. T. KumaráSarma, *Chemical Communications*, 2002, 1048-1049.

**Table S2 Optimum temperature of each sensor for target gases of VOCs.**

| Sensor materials    | Optimum temperature (°C) | Target gases                                                                                                                |
|---------------------|--------------------------|-----------------------------------------------------------------------------------------------------------------------------|
| Pure ZnO nanoplates | 260                      | diethyl ether, methanol                                                                                                     |
|                     | 360                      | acetone, formaldehyde, trichloro ethylene, ethyl acetate, isoprene, butyl acetate, hexaldehyde                              |
|                     | 460                      | chlorobenzene, o-xylene, n-heptane, benzene, toluene, n-decane                                                              |
| 1% Au@ZnO           | 360                      | acetone, methanol, formaldehyde, ethyl acetate, benzene, o-xylene, chlorobenzene, isoprene, butyl acetate, hexaldehyde      |
|                     | 460                      | diethyl ether, n-heptane, trichloro ethylene, toluene, n-decane                                                             |
| 3% Au@ZnO           | 260                      | methanol, trichloro ethylene                                                                                                |
|                     | 360                      | acetone, formaldehyde, diethyl ether, ethyl acetate, benzene, o-xylene, chlorobenzene, isoprene, butyl acetate, hexaldehyde |
|                     | 460                      | n-heptane, toluene, n-decane                                                                                                |
| 5% Au@ZnO           | 260                      | methanol, trichloro ethylene                                                                                                |
|                     | 360                      | acetone, diethyl ether, ethyl acetate, benzene, toluene, o-xylene, chlorobenzene, isoprene, butyl acetate, hexaldehyde      |
|                     | 460                      | formaldehyde, n-heptane, n-decane                                                                                           |

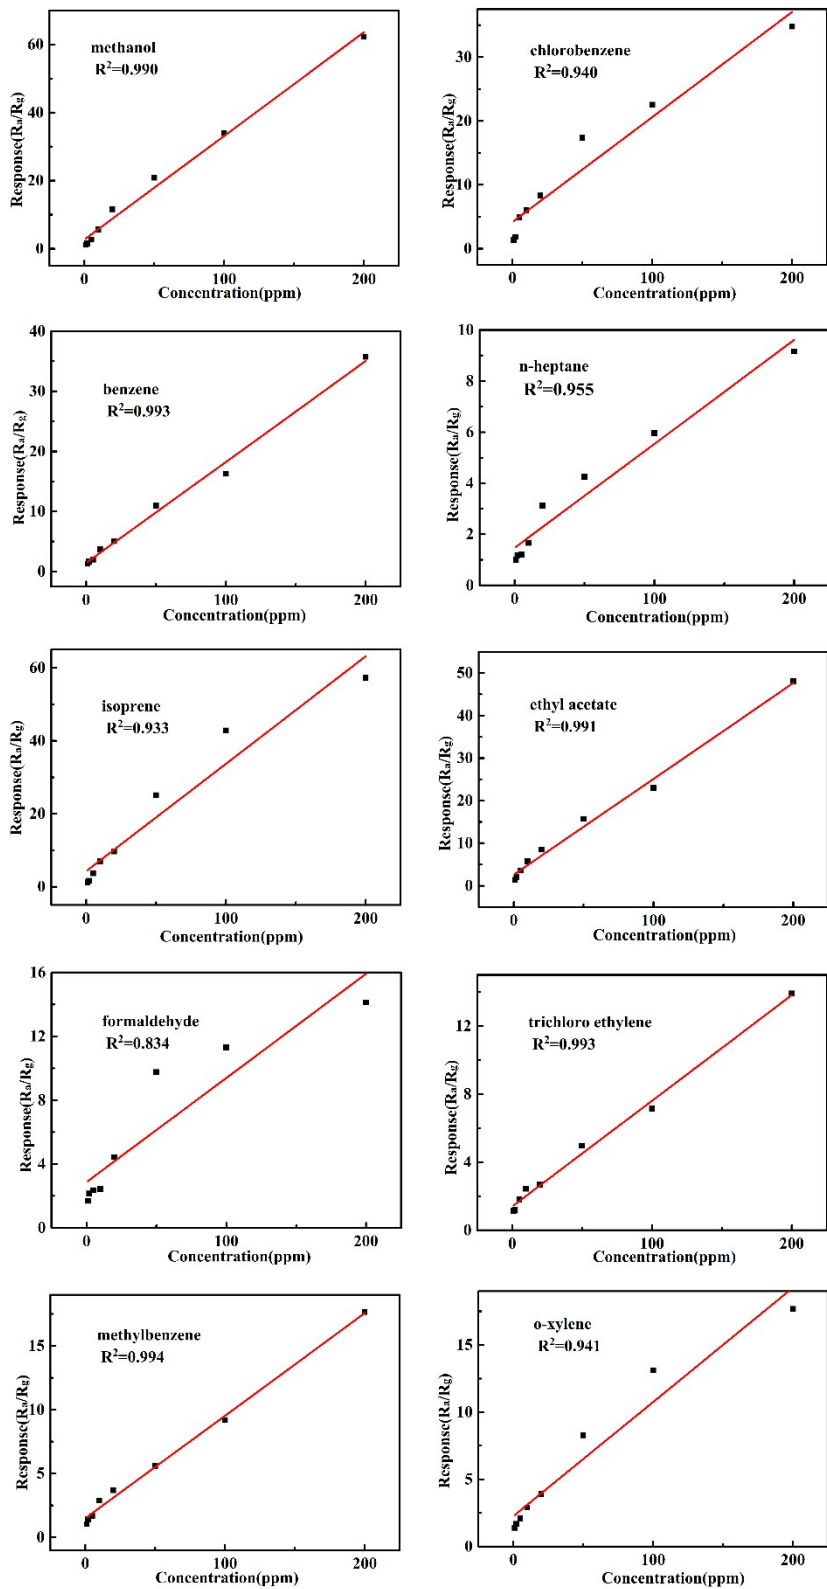

**Figure S2.** The relation between the sensor sensitivity and VOCs concentration measured at 360 °C for 5% Au@ZnO sensor.

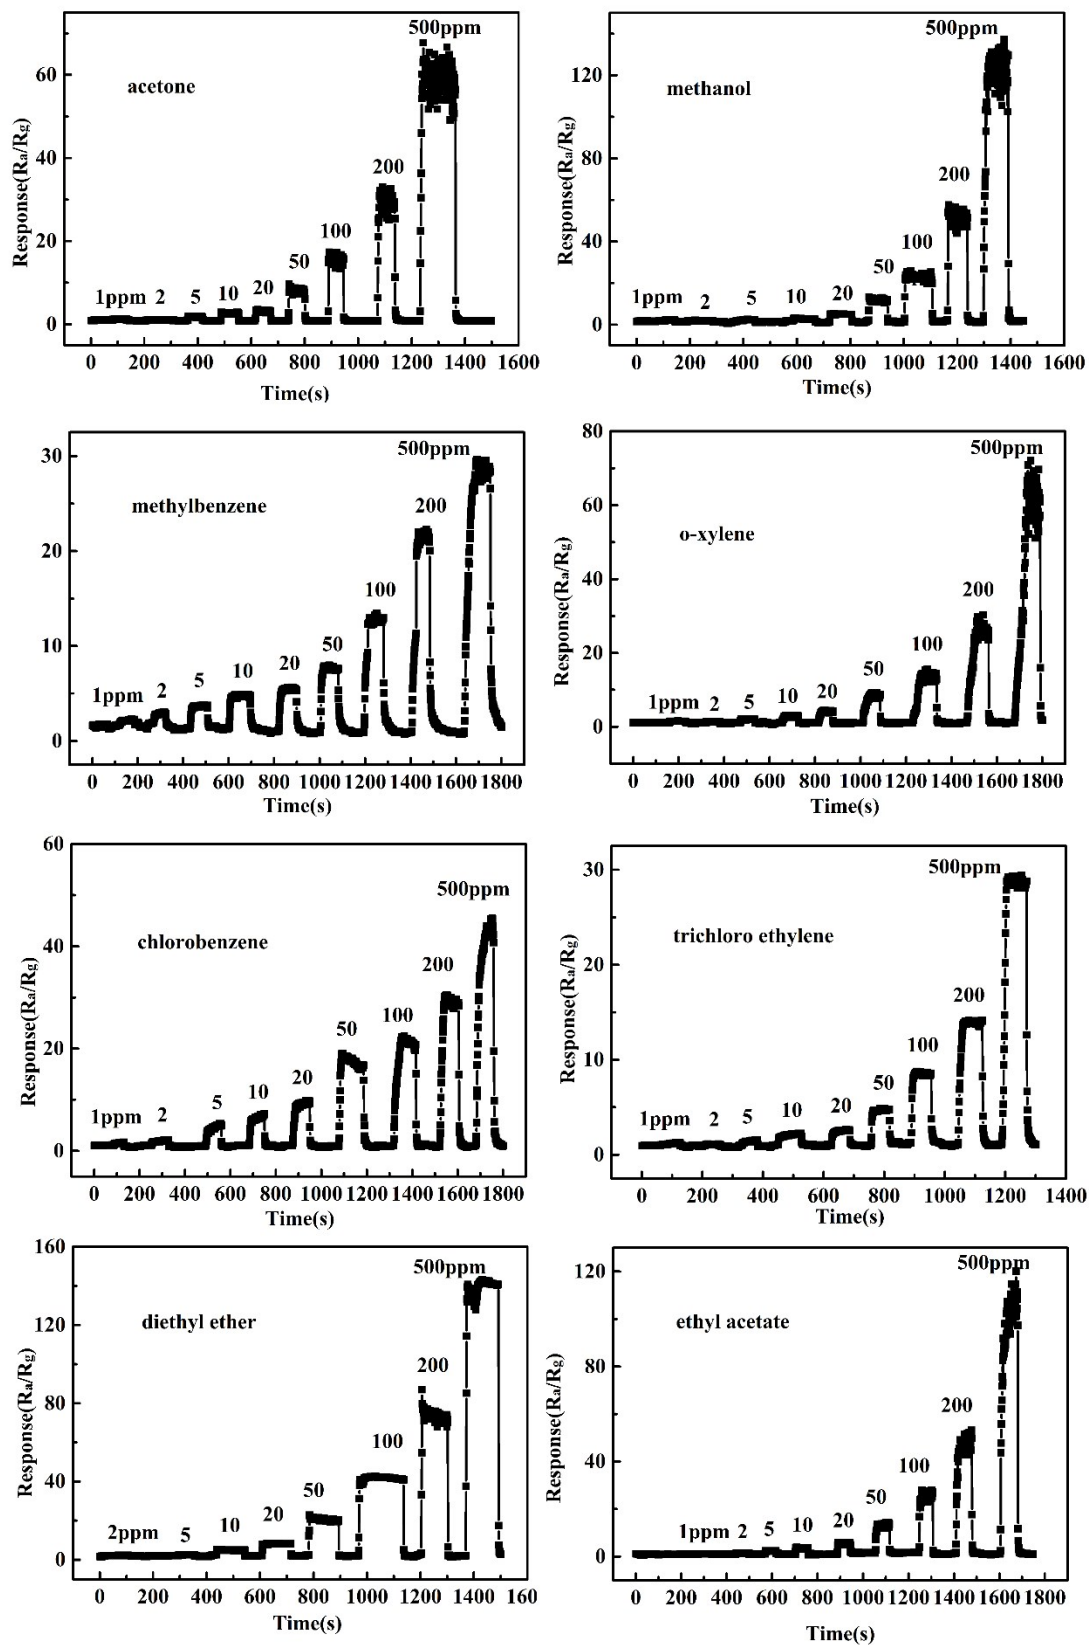

**Figure S3. Response curves of 5% Au@ZnO sensor towards methanol, diethyl ether, acetone, chlorobenzene, trichloro ethylene, methylbenzene, o-xylene and ethyl acetate with increasing concentration at 360 °C.**

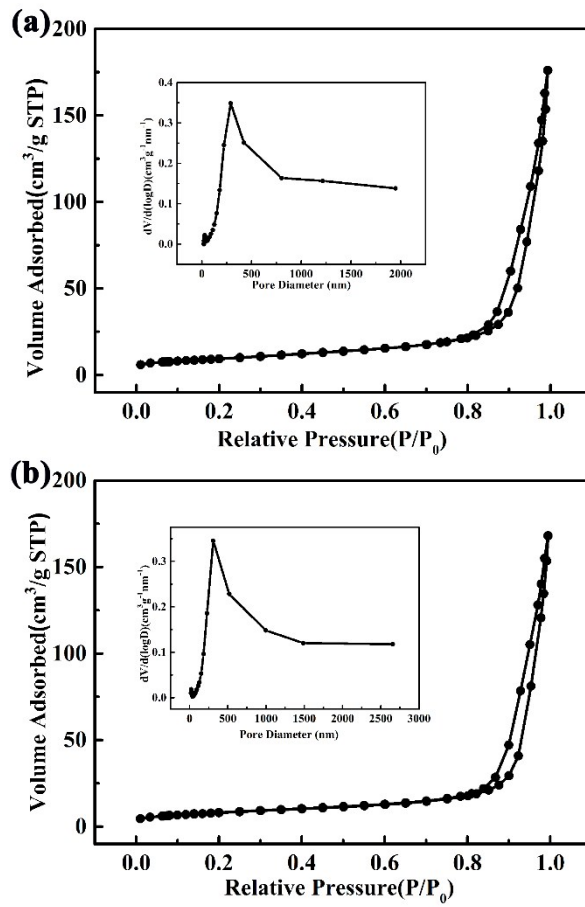

Figure S4. Typical nitrogen adsorption-desorption isotherm and BJH pore size distribution plots (inset) of (a) porous ZnO nanoplates and (b) 5% Au@ZnO.



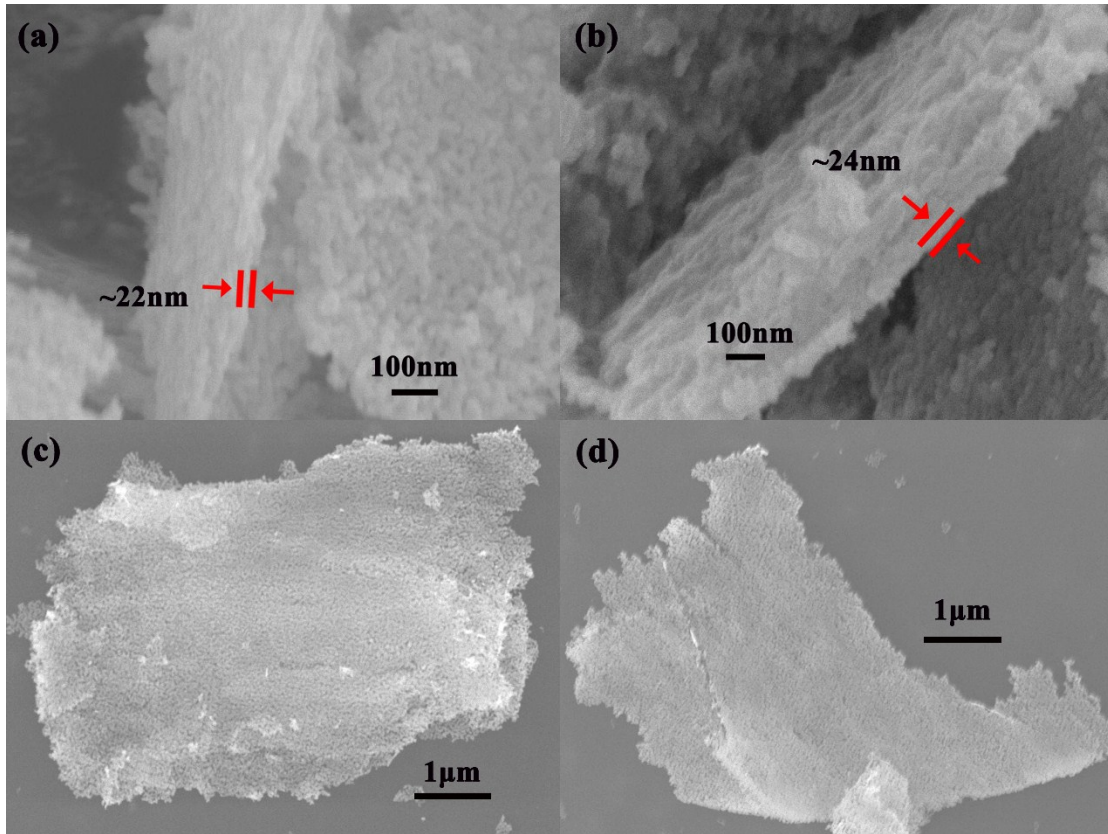

**Figure S5. SEM images of (a) (c) porous ZnO nanoplates and (b) (d) 5% Au@ZnO.**

Figure S5 (a) shows the pure ZnO, composed of plate-like nanostructures with edge thickness of about 22 nm and porous surfaces. Figure S6 (b) displays the Au@ZnO nanoplates, with the edge thickness of about 24 nm. The dimensions of porous ZnO nanoplates and 5% Au@ZnO were showed in figure (c) (d). The ZnO nanoplates is about 6.5 μm long and 4 μm wide. And after the photodeposition process, the 5% Au@ZnO still kept plate-like morphology.

**Table S3. The response time and recovery time of 5% Au@ZnO sensor at 100ppm**

| Representative gases | Response time(s) | Recovery time(s) |
|----------------------|------------------|------------------|
| methanol             | <b>4</b>         | <b>3</b>         |
| chlorobenzene        | <b>10</b>        | <b>14</b>        |
| benzene              | <b>6</b>         | <b>4</b>         |
| n-heptane            | <b>3</b>         | <b>4</b>         |
| isoprene             | <b>3</b>         | <b>4</b>         |
| ethyl acetate        | <b>4</b>         | <b>8</b>         |
| formaldehyde         | <b>30</b>        | <b>12</b>        |

**Table S4. The response/recovery characteristics of other sensors based on metal oxide nanostructures.**

| Representative gases of VOCs (100ppm)    | Sensor materials                                               | response/recovery time(s) | References |
|------------------------------------------|----------------------------------------------------------------|---------------------------|------------|
| Oxy hydrocarbons (Methanol)              | AuNP-functionalized 3D hierarchically porous ZnO nanomaterials | About 10/60               | [3]        |
| Halogenated hydrocarbons (Chlorobenzene) | Porous ZnO Nanoplates                                          | 103/22                    | [4]        |
| Aromatic hydrocarbons (Benzene 10ppm)    | Au-functionalized ZnO nanowires                                | 70/27                     | [5]        |
| Aliphatic hydrocarbons (Butane 0.4mol/L) | TiO <sub>2</sub>                                               | About 180/60              | [6]        |
| Terpenes ( $\alpha$ -Pinene)             | Nano-structured WO <sub>3</sub>                                | About 420/180             | [7]        |
| Esters (Ethyl acetate)                   | MOS-based gas sensor array                                     | -                         | [8]        |
| Aldehydes (Formaldehyde 5ppm)            | Au@ZnO core-shell structure                                    | 138/104                   | [9]        |

Compared the response/recovery times of the sensor materials in the list, the 5% Au@ZnO shows fast response/recovery times.

- [3]. X. Liu, J. Zhang, L. Wang, T. Yang, X. Guo, S. Wu and S. Wang, *Journal of Materials Chemistry*, 2011, **21**, 349-356.
- [4]. Z. Jing and J. Zhan, *Advanced Materials*, 2008, **20**, 4547-4551.
- [5]. L. Wang, S. Wang, M. Xu, X. Hu, H. Zhang, Y. Wang and W. Huang, *Physical Chemistry Chemical Physics*, 2013, **15**, 17179-17186.
- [6]. A. Zotti, S. Zuppolini, M. Giordano, M. Zarrelli, A. Borriello and G. De Luca. *2015 XVIII AISEM Annual Conference*.2015,3.
- [7]. S. Paczkowski, T. Sauerwald, A. Weiß, M. Bauer, D. Kohl and S. Schütz. *Bioinspiration, Biomimetics, and Bioreplication*,2011,**7975**,05.
- [8]. T. Konduru, G. C. Rains and C. Li, *Sensors*, 2015, **15**, 1252-1273.
- [9]. F.-C. Chung, Z. Zhu, P.-Y. Luo, R.-J. Wu and W. Li, *Sensors and Actuators B: Chemical*, 2014, **199**, 314-319.

**Table S5. Previous reported about sensing performance of Au on ZnO nanoplates.**

| Materials                                                     | Operating temperature (°C) | Target gases (100ppm) | Response value | Response/recovery Time (s) | Ref.      |
|---------------------------------------------------------------|----------------------------|-----------------------|----------------|----------------------------|-----------|
| Au-functionalized 3D hierarchically porous ZnO nanomaterials, | 300                        | ethanol               | ~18            | ~10/60                     | [19]      |
|                                                               |                            | methanol              | ~11.5          | ~10/60                     |           |
| Au-supported ZnO nanoplates                                   | 300                        | ethanol               | ~20            | 13/~100                    | [52]      |
|                                                               |                            | acetone               | ~16            | -                          |           |
| Au-deposited ZnO nanoplates                                   | 360                        | methanol              | 35             | 4/3                        | This work |

19. X. Liu, J. Zhang, L. Wang, T. Yang, X. Guo, S. Wu and S. Wang, *Journal of Materials Chemistry*, 2011, **21**, 349-356.

52. J. Zhang, X. Liu, S. Wu, B. Cao and S. Zheng, *Sensors and Actuators B: Chemical*, 2012, **169**, 61-66.

**Table S6. Response of representative gases of each group.**

| Classification of VOCs   | Representative gases | Response at 50 ppm |
|--------------------------|----------------------|--------------------|
| Oxy hydrocarbons         | methanol             | 20.853             |
|                          | diethyl ether        | 21.627             |
|                          | acetone              | 10.230             |
| Halogenated hydrocarbons | chlorobenzene        | 16.698             |
|                          | trichloro ethylene   | 4.019              |
| Aromatic hydrocarbons    | benzene              | 11.463             |
|                          | toluene              | 6.728              |
|                          | o-xylene             | 7.749              |
| Aliphatic hydrocarbons   | n-heptane            | 4.578              |
|                          | n-decane             | 10.891             |
| Terpenes                 | isoprene             | 25.090             |
| Esters                   | ethyl acetate        | 23.543             |
|                          | butyl acetate        | 15.775             |
| Aldehydes                | formaldehyde         | 9.579              |
|                          | hexaldehyde          | 21.728             |
